# Supplementary material for: Antibiotic Resistance Genes in Phage Particles from Antarctic and Mediterranean Seawater Ecosystems
Source: PubMed Central journal article supplement (PMC7565065; doi:10.3390/microorganisms8091293), 2020-08-24
Supplement: microorganisms-08-01293-s001.pdf [file microorganisms-08-01293-s001.pdf]

# Antibiotic Resistance Genes in Phage Particles from Antarctic and Mediterranean Seawater Ecosystems

Pedro Blanco-Picazo <sup>1</sup>, Gabriel Roscales <sup>1</sup>, Daniel Toribio-Avedillo <sup>1</sup>, Clara Gómez-Gómez <sup>1</sup>, Conxita Avila <sup>2</sup>, Elisenda Ballesté <sup>1</sup>, Maite Muniesa <sup>1,\*</sup> and Lorena Rodríguez-Rubio <sup>1,\*</sup>

<sup>1</sup> Department of Genetics, Microbiology and Statistics, University of Barcelona, Diagonal 643, Annex, Floor 0, 08028 Barcelona, Spain; p.blanco@ub.edu (P.B.-P.), gascheb@gmail.com (G.R.), d.toribio.avedillo@ub.edu (D.T.-A.), claragg1995@gmail.com (C.G.-G.), eballesté@ub.edu (E.B.)

<sup>2</sup> Department of Evolutionary Biology, Ecology and Environmental Sciences (BEECA), Faculty of Biology, and Biodiversity Research Institute (IrBIO), University of Barcelona, Diagonal 643, 08028 Barcelona, Spain; conxita.avila@ub.edu

\* Correspondence: mmuniesa@ub.edu (M.M.); lorenarodriguez@ub.edu (L.R.-R.)

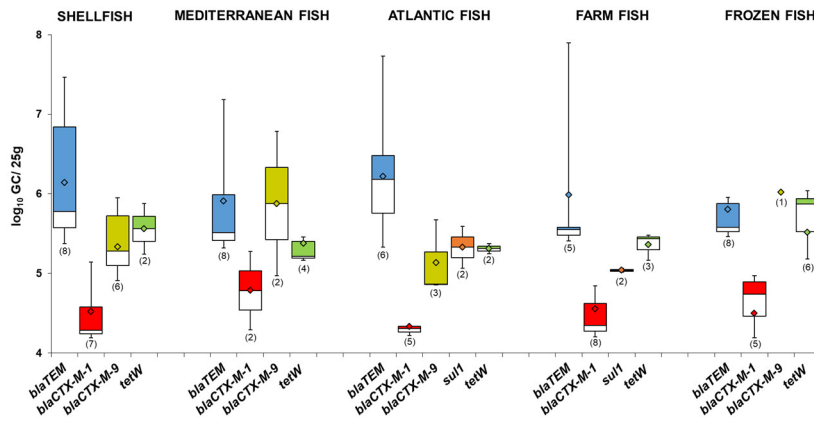

**Figure S1.** Abundance of ARGs in the DNA isolated from phage particles in fish and shellfish grouped by fish matrix. Data is represented in boxplots ( $\log_{10}GC/25g$ ). Percentage represents the number of positive samples detected. The diamond represents the average value of the positive samples, the upper squares include samples whose values are within the 75th percentile, and those in the lower white boxes are within the 25th percentile.

**Table S1.** Oligonucleotides used in this study.

| Target Gene                         | Oligonucleotide | Sequence                              | Amplifier (bp) | LOQ (GC/ $\mu$ l) | Reference |
|-------------------------------------|-----------------|---------------------------------------|----------------|-------------------|-----------|
| <i>bla</i> <sub>TEM</sub>           | UP              | CACTATTCTCAGAATGACTTGGT               | 85             | 2.4               | [50]      |
|                                     | LP              | TGCATAATTCTCTTACTGTCATG               |                |                   |           |
|                                     | TaqMan TEM      | 6FAM-CCAGTCACAGAAAAGCATCTTACGG-MGBNFQ |                |                   |           |
| <i>bla</i> <sub>CTX-M-1</sub> group | UP              | ACCAACGATATCGCGGTGAT                  | 101            | 0.2               | [15]      |
|                                     | LP              | ACATCGCGACGGCTTTCT                    |                |                   |           |
|                                     | TaqMan CTX-M-1  | 6FAM-TCGTGCGCCGCTG-MGBNFQ             |                |                   |           |
| <i>bla</i> <sub>CTX-M-9</sub> group | UP              | ACCAATGATATGCGGTGAT                   | 85             | 1.0               | [22]      |

|                              |                    |                                                 |     |      |            |
|------------------------------|--------------------|-------------------------------------------------|-----|------|------------|
|                              | LP                 | CTGCGTTCGTGCGGCT                                |     |      |            |
|                              | TaqMan CTX-M-9     | 6FAM – TCGTGCGCCGCTG- MGBNFQ                    |     |      |            |
| <i>bla</i> <sub>OXA-48</sub> | UP                 | CGGTAGCAAAGGAATGGCAA                            | 133 | 18.4 | [20]       |
|                              | LP                 | TGGTTCGCCCCGTTAAGATT                            |     |      |            |
|                              | TaqMan OXA-48      | 6FAM-CGTAGTTGTGCTCTGGA-MGBNFQ                   |     |      |            |
| <i>bla</i> <sub>VIM</sub>    | UP                 | AATGGTCTCATTGTCCGTGATG                          | 61  | 22.5 | [23]       |
|                              | LP                 | TCGCACCCACGCTGTA                                |     |      |            |
|                              | TaqMan VIM         | 6FAM –TGATGAGTTGCTTTTGATTG-MGBNFQ               |     |      |            |
| <i>sul1</i>                  | UP                 | CCGTGGCCTTCCTGTAAAG                             | 67  | 1.5  | [17]       |
|                              | LP                 | TTGCCGATCGCGTGAAGT                              |     |      |            |
|                              | TaqMan <i>sul1</i> | 6FAM-CGAGCCTTGCGGCGG-MGBNFQ                     |     |      |            |
| <i>mecA</i>                  | UP                 | CGCAACGTTCAATTTAATTTGTAA                        | 92  | 11.7 | [51]       |
|                              | LP                 | TGGTCTTTCTGCATTCCTGGA                           |     |      |            |
|                              | TaqMan <i>mecA</i> | 6FAM-AATGACGCTATGATCCCAATCTAACTCCA<br>CA-MGBNFQ |     |      |            |
| <i>qnrA</i>                  | UP                 | AGGATTGCAGTTTCATTGAAAGC                         | 138 | 0.9  | [52]       |
|                              | LP                 | TGAACTCTATGCCAAAGCAGTTG                         |     |      |            |
|                              | TaqMan <i>qnrA</i> | 6FAM-TATGCCGATCTGCGCGA-MGBNFQ                   |     |      |            |
| <i>qnrS</i>                  | UP                 | CGACGTGCTAACTGCGTGA                             | 118 | 2.0  | [52]       |
|                              | LP                 | GGCATTGTTGGAAACTTGCA                            |     |      |            |
|                              | TaqMan <i>qnrS</i> | 6FAM-AGTTCATTGAACAGGGTGA-MGBNFQ                 |     |      |            |
| <i>armA</i>                  | UP                 | GAAAGAGTCGCAACATTAATGACTT                       | 94  | 8.0  | [53]       |
|                              | LP                 | GATTGAAGCCACAACCAAAATCT                         |     |      |            |
|                              | TaqMan <i>armA</i> | 6FAM-TCAAACATGTCTCATCTATT-MGBNFQ                |     |      |            |
| <i>tetW</i>                  | UP                 | GACGGACACCATGTTTTTGGGA                          | 62  | 1.9  | This study |
|                              | LP                 | AGGAAGTGA CTGCCGCTGA                            |     |      |            |
|                              | TaqMan <i>tetW</i> | 6FAM-AGCGTG GGATTACCA- MGBNFQ                   |     |      |            |
| 16SrDNA                      | 338F               | ACTCCTACGGGAGGCAGCAG                            | 236 |      | [54]       |
|                              | 518R               | ATTACCGCGGCTGCTGG                               |     |      |            |
| pGEM                         | pGEM7up            | TGTAATACGACTCACTAT                              |     |      | Promega    |
